# Supplementary material
Source: ML conference proceedings conference paper supplement (https://proceedings.mlr.press/v70/cuturi17a.html)
Supplement: Supplementary file [file cuturi17a-supp.pdf]

# Appendix material

## A. Recursive forward computation of the average path matrix

The average alignment under Gibbs distribution  $p_\gamma$  can be computed with the following forward recurrence, which mimics closely Bellman's original recursion. For each  $i \in \llbracket n \rrbracket, j \in \llbracket m \rrbracket$ , define

$$E_{i+1,j+1} = \begin{bmatrix} e^{-\delta_{i+1,j+1}/\gamma} E_{i,j} & \mathbf{0}_i \\ \mathbf{0}_j^T & e^{-r_{i+1,j+1}/\gamma} \end{bmatrix} + \begin{bmatrix} e^{-\delta_{i+1,j+1}/\gamma} E_{i,j+1} \\ \mathbf{0}_j^T & e^{-r_{i+1,j+1}/\gamma} \end{bmatrix} + \begin{bmatrix} e^{-\delta_{i+1,j+1}/\gamma} E_{i+1,j} & \mathbf{0}_i \\ \mathbf{0}_j^T & e^{-r_{i+1,j+1}/\gamma} \end{bmatrix}$$

Here terms  $r_{ij}$  are computed following the recursion in Algorithm 2. Border matrices are initialized to 0, except for  $E_{1,1}$  which is initialized to [1]. Upon completion, the average alignment matrix is stored in  $E_{n,m}$ .

The operation above consists in summing three matrices of size  $(i+1, j+1)$ . There are exactly  $(nm)$  such updates. A careful implementation of this algorithm, that would only store two arrays of matrices, as Algorithm 1 only store two arrays of values, can be carried out in  $nm \min(n, m)$  space but it would still require  $(nm)^2$  operations.

**B. Barycenters obtained with random initialization**

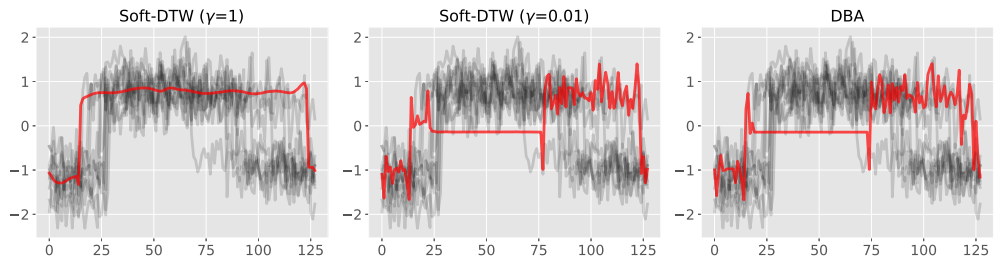

(a) CBF

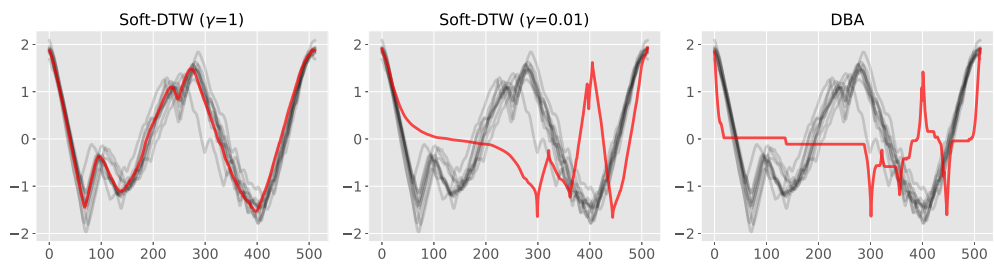

(b) Herring

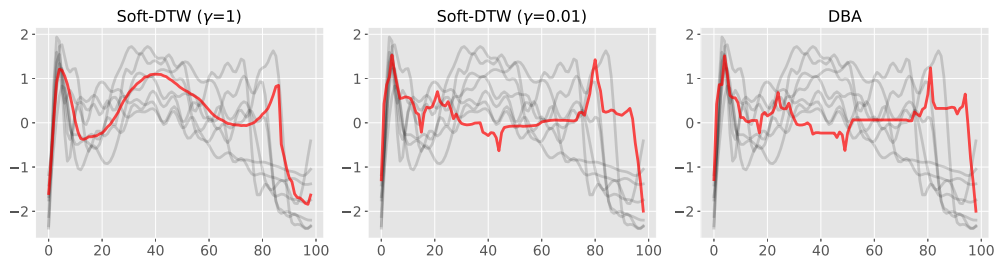

(c) Medical Images

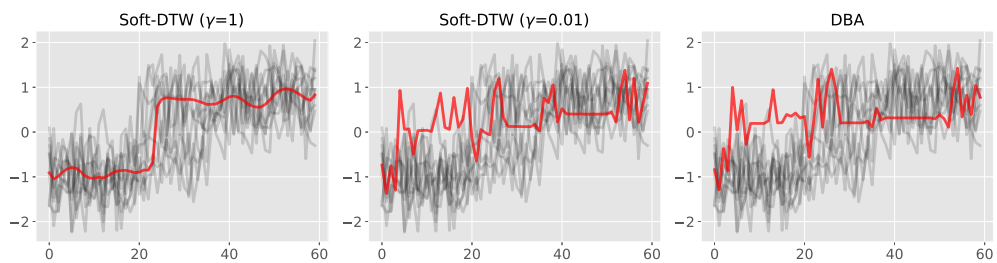

(d) Synthetic Control

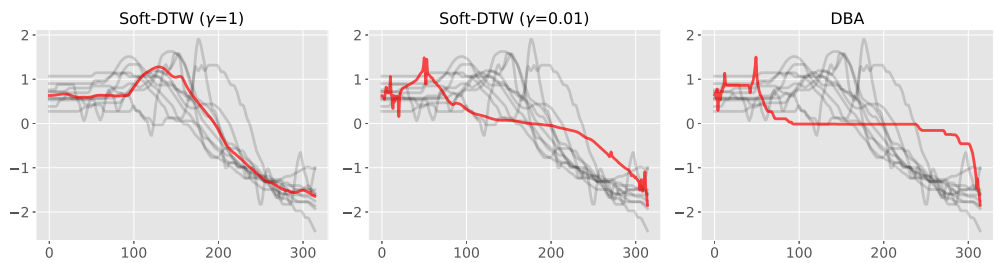

(e) Wave Gesture Library Y

C. Barycenters obtained with Euclidean mean initialization

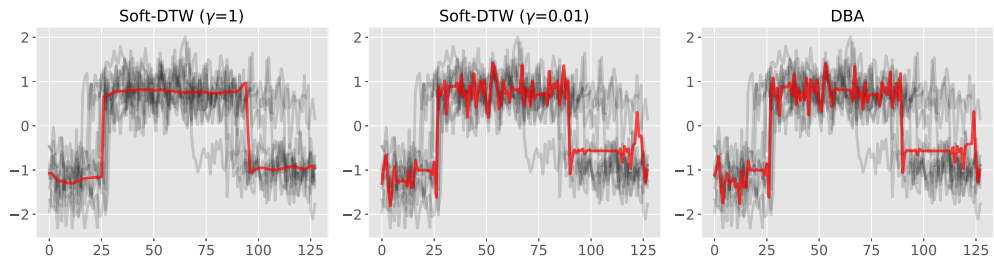

(a) CBF

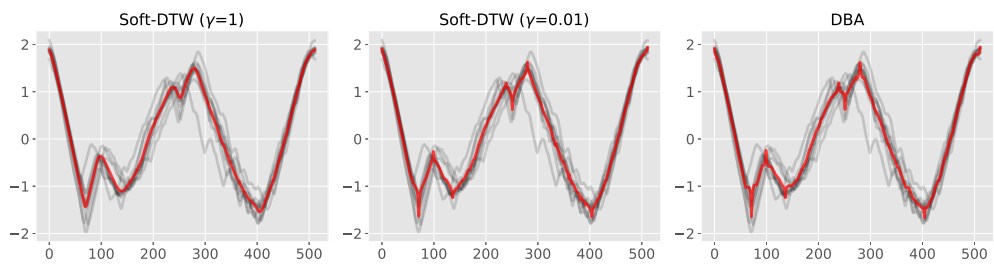

(b) Herring

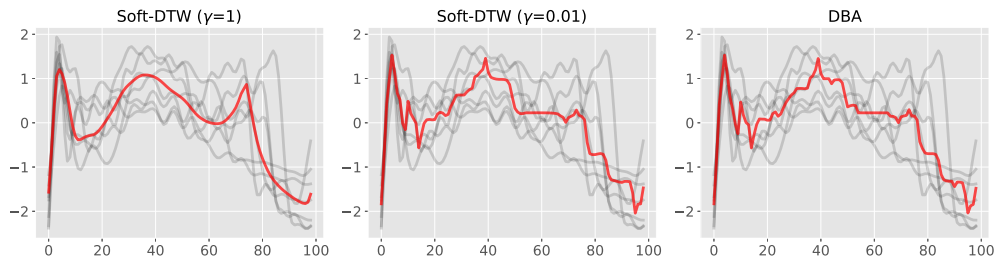

(c) Medical Images

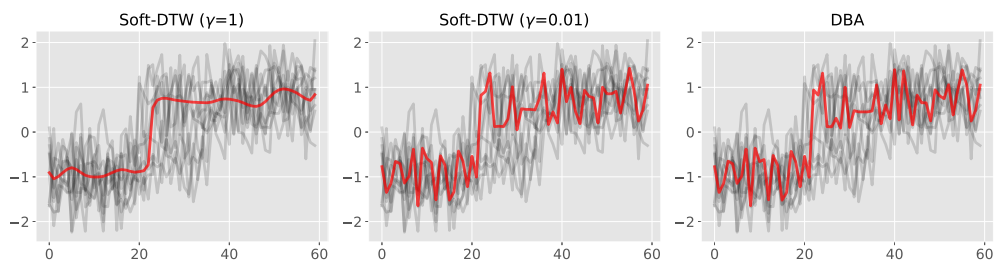

(d) Synthetic Control

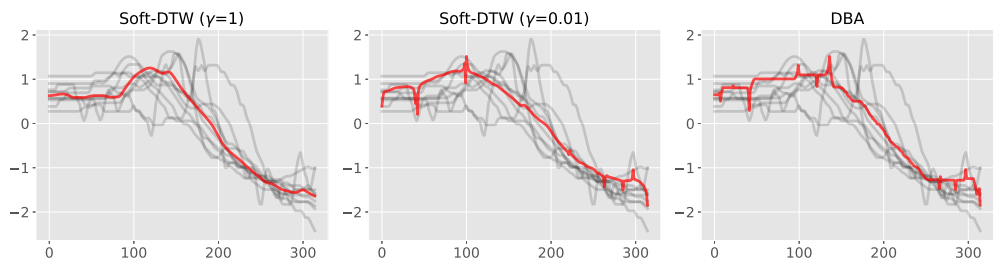

(e) Wave Gesture Library Y

### D. More interpolation results

Left: results obtained under Euclidean loss. Right: results obtained under soft-DTW ( $\gamma = 1$ ) loss.

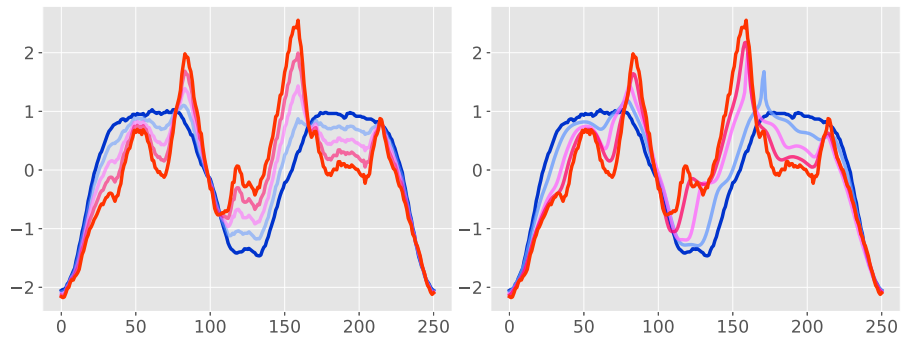

(a) ArrowHead

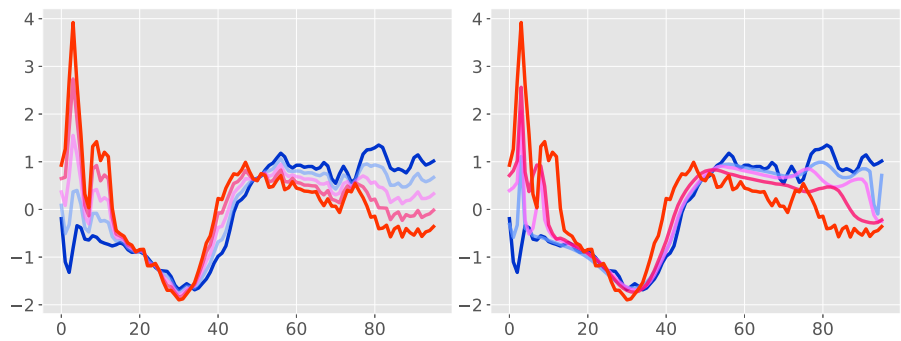

(b) ECG200

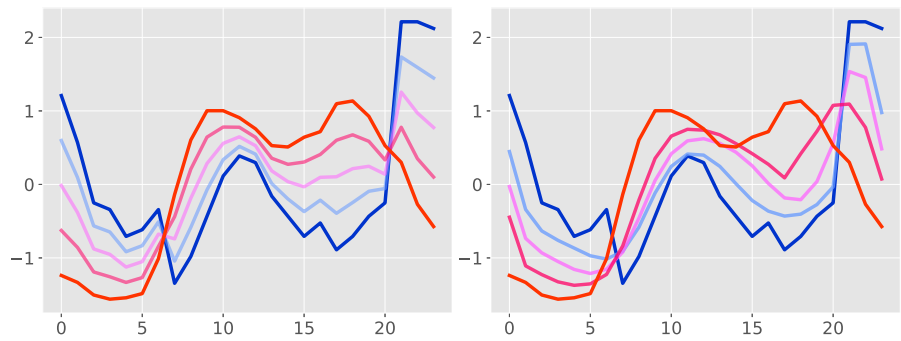

(c) ItalyPowerDemand

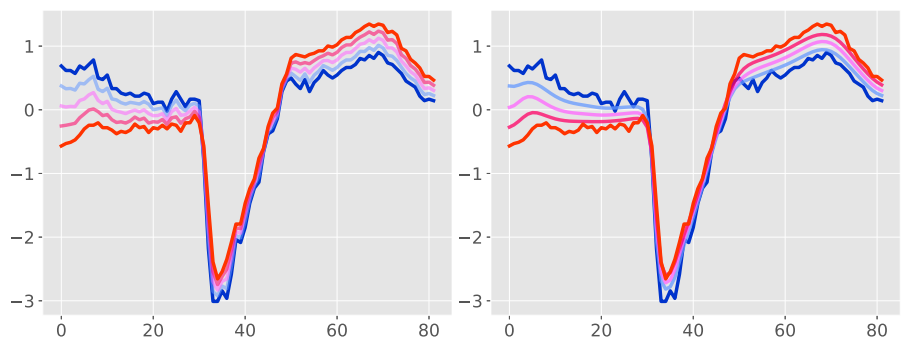

(d) TwoLeadECG

E. Clusters obtained by  $k$ -means under DTW or soft-DTW geometry

CBF dataset

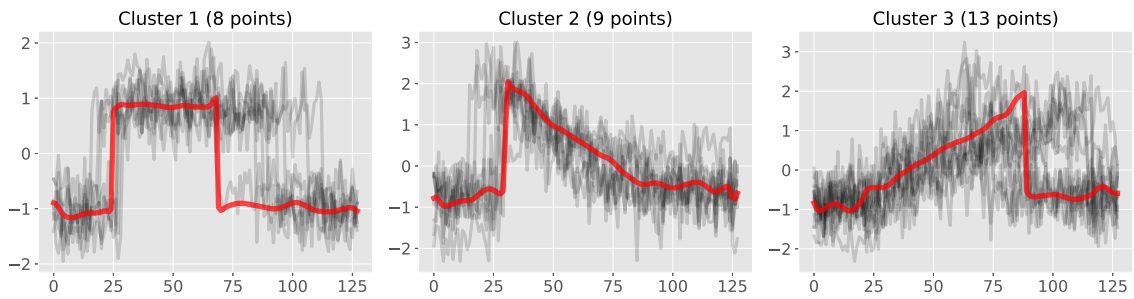

(a) Soft-DTW ( $\gamma = 1$ , random initialization)

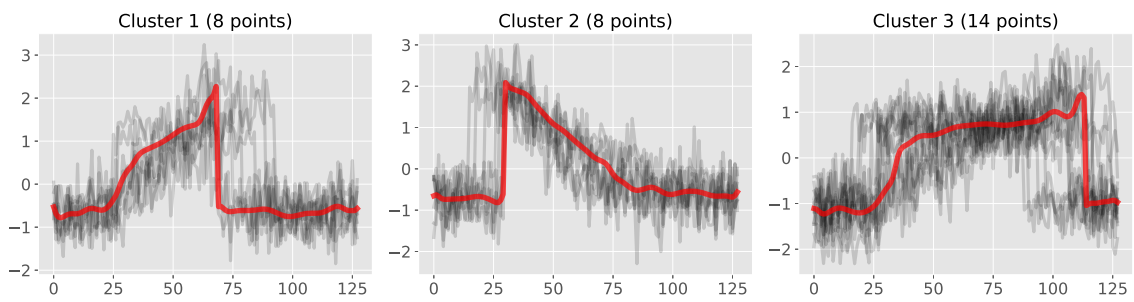

(b) Soft-DTW ( $\gamma = 1$ , Euclidean mean initialization)

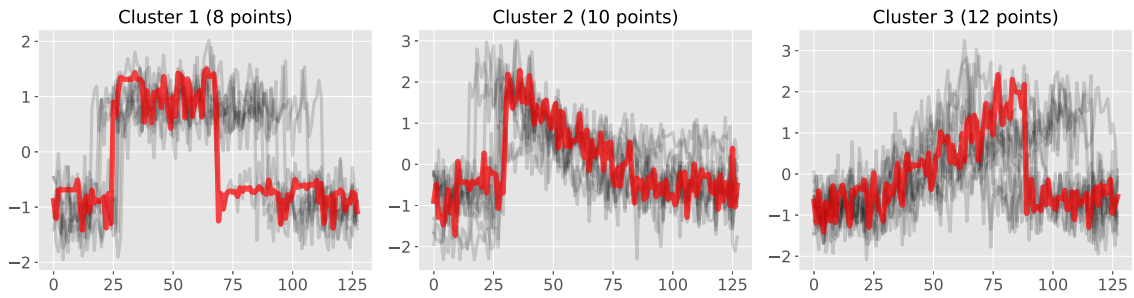

(c) DBA (random initialization)

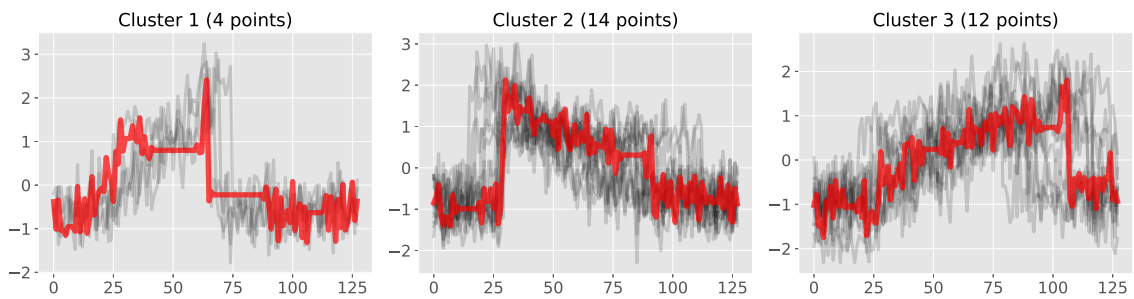

(d) DBA (Euclidean mean initialization)

ECG200 dataset

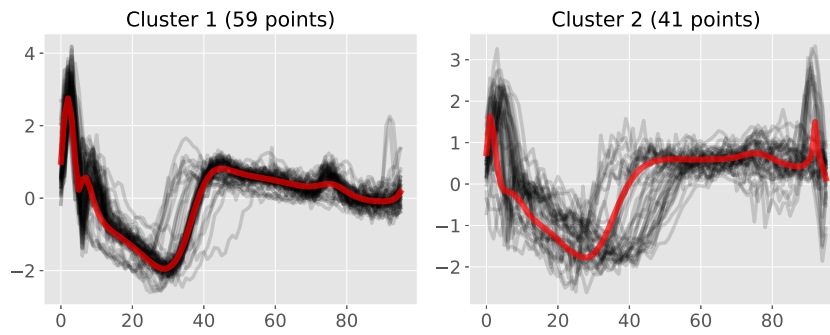

(a) Soft-DTW ( $\gamma = 1$ , random initialization)

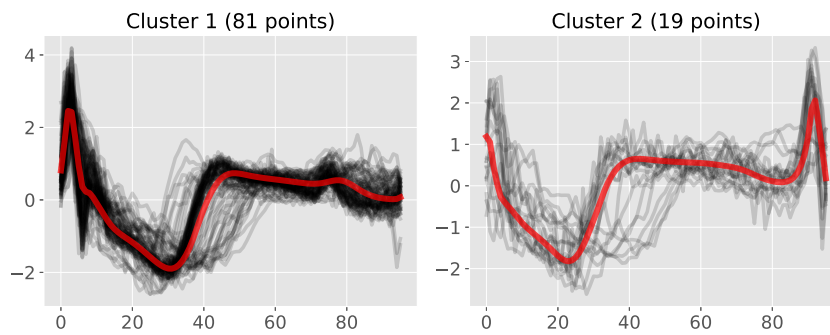

(b) Soft-DTW ( $\gamma = 1$ , Euclidean mean initialization)

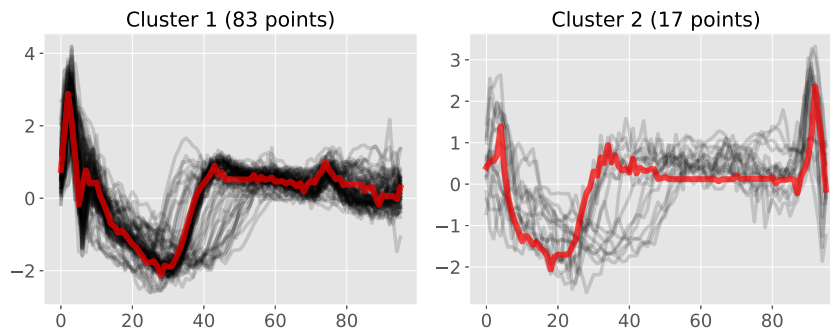

(c) DBA (random initialization)

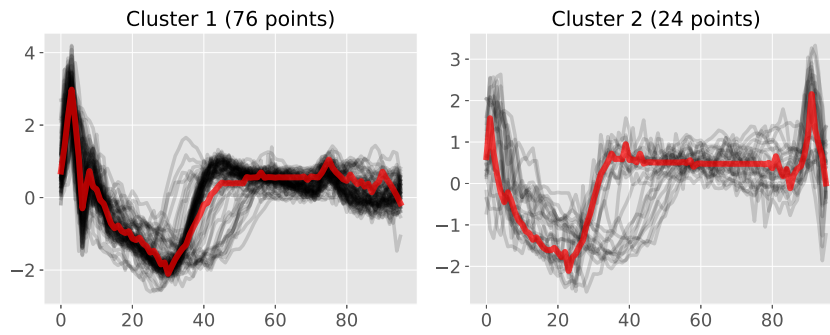

(d) DBA (Euclidean mean initialization)

## F. More visualizations of time-series prediction

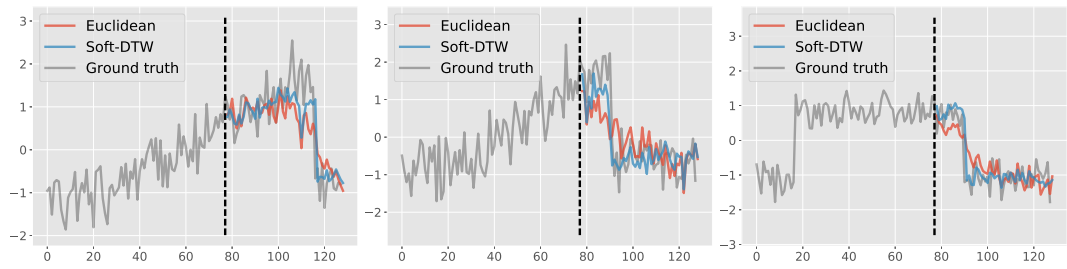

(a) CBF

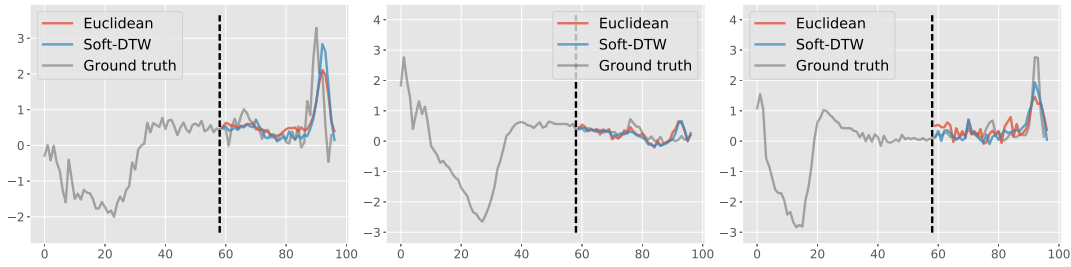

(b) ECG200

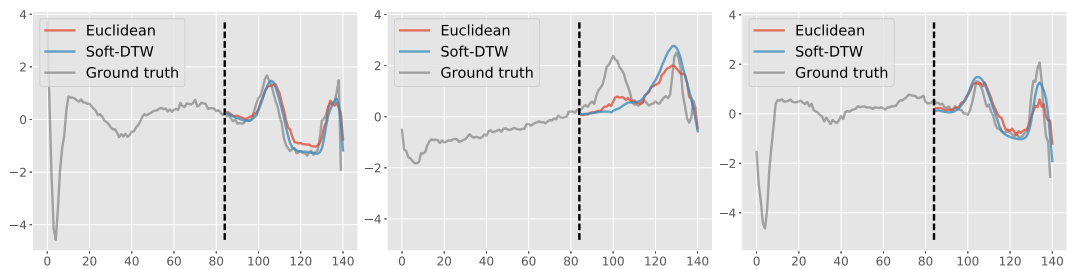

(c) ECG5000

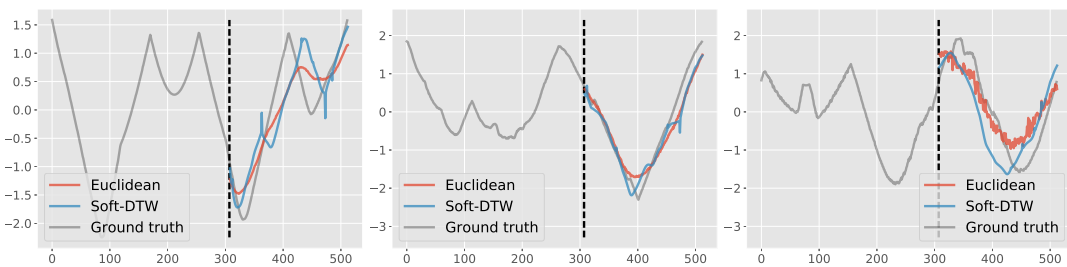

(d) ShapesAll

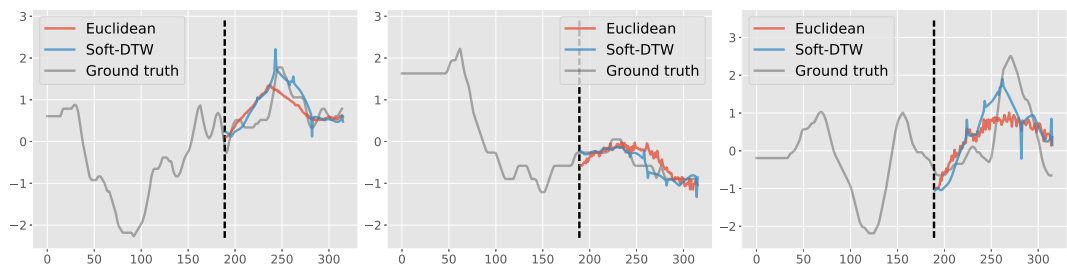

(e) uWaveGestureLibrary\_Y



G. Barycenters: DTW loss (Eq. 4 with  $\gamma = 0$ ) achieved with random init

| Dataset                        | Soft-DTW $\gamma = 1$ | $\gamma = 0.1$ | $\gamma = 0.01$ | $\gamma = 0.001$ | Subgradient method | DBA     | Euclidean mean |
|--------------------------------|-----------------------|----------------|-----------------|------------------|--------------------|---------|----------------|
| 50words                        | 5.000                 | 2.785          | <b>2.513</b>    | 2.721            | 44.399             | 4.554   | 25.388         |
| Adiac                          | 0.235                 | 0.207          | 0.257           | 0.428            | 25.533             | 0.754   | <b>0.177</b>   |
| ArrowHead                      | 2.390                 | 1.598          | <b>1.487</b>    | 1.664            | 36.125             | 2.512   | 2.743          |
| Beef                           | 10.471                | 6.541          | <b>6.200</b>    | 6.238            | 88.100             | 7.780   | 25.347         |
| BeetleFly                      | 35.790                | 23.655         | <b>22.559</b>   | 23.105           | 77.993             | 25.122  | 191.574        |
| BirdChicken                    | 23.300                | 12.542         | <b>11.164</b>   | 11.954           | 45.777             | 12.820  | 92.061         |
| CBF                            | 21.098                | <b>11.949</b>  | 12.564          | 12.667           | 30.281             | 14.836  | 28.236         |
| Car                            | 2.639                 | 1.750          | <b>1.611</b>    | 1.914            | 80.437             | 2.609   | 5.106          |
| ChlorineConcentration          | 22.260                | <b>13.932</b>  | 14.818          | 15.044           | 32.134             | 16.168  | 15.411         |
| CinC_ECG_torso                 | 118.872               | 80.248         | <b>76.536</b>   | 76.812           | 262.221            | 90.663  | 761.238        |
| Coffee                         | 1.036                 | 0.871          | 1.262           | 1.630            | 41.741             | 2.380   | <b>0.591</b>   |
| Computers                      | 231.421               | 182.380        | <b>178.184</b>  | 179.886          | $\infty$           | 183.388 | 391.830        |
| Cricket_X                      | 41.514                | 29.290         | <b>28.424</b>   | 28.851           | 70.128             | 28.955  | 104.699        |
| Cricket_Y                      | 51.858                | <b>30.321</b>  | 30.337          | 31.041           | 70.989             | 33.098  | 107.712        |
| Cricket_Z                      | 43.458                | 30.264         | <b>28.668</b>   | 29.373           | 68.382             | 32.182  | 128.129        |
| DiatomSizeReduction            | 0.055                 | 0.054          | 0.064           | 0.132            | 49.308             | 0.418   | <b>0.033</b>   |
| DistalPhalanxOutlineAgeGroup   | 1.380                 | 1.074          | 1.407           | 1.509            | 11.539             | 1.761   | <b>0.981</b>   |
| DistalPhalanxOutlineCorrect    | 2.501                 | <b>1.968</b>   | 2.267           | 2.634            | 13.169             | 2.991   | 2.374          |
| DistalPhalanxTW                | 1.148                 | 0.906          | 1.015           | 1.159            | 10.957             | 1.228   | <b>0.867</b>   |
| ECG200                         | 7.374                 | <b>6.400</b>   | 6.871           | 7.047            | 19.514             | 8.257   | 10.107         |
| ECG5000                        | <b>8.951</b>          | 8.961          | 10.601          | 10.265           | 34.558             | 12.098  | 14.517         |
| ECGFiveDays                    | 9.816                 | <b>9.019</b>   | 9.364           | 9.407            | 17.898             | 9.837   | 23.975         |
| Earthquakes                    | 148.959               | <b>85.219</b>  | 85.470          | 85.515           | $\infty$           | 85.788  | 330.776        |
| ElectricDevices                | 27.852                | <b>23.769</b>  | 23.783          | 24.009           | $\infty$           | 24.869  | 56.470         |
| FISH                           | 0.978                 | <b>0.641</b>   | 0.662           | 0.957            | 63.566             | 1.680   | 1.543          |
| FaceAll                        | 15.068                | <b>12.373</b>  | 13.248          | 13.494           | 24.582             | 15.980  | 29.982         |
| FaceFour                       | 15.500                | <b>14.519</b>  | 15.002          | 14.849           | $\infty$           | 16.339  | 25.410         |
| FacesUCR                       | 15.033                | <b>13.077</b>  | 13.405          | 14.174           | 30.621             | 14.796  | 27.026         |
| FordA                          | 56.936                | <b>45.492</b>  | 46.170          | 46.038           | 96.087             | 49.723  | 218.482        |
| FordB                          | 59.117                | 47.812         | <b>47.058</b>   | 47.642           | 102.279            | 50.262  | 250.595        |
| Gun_Point                      | 7.204                 | 2.507          | <b>2.037</b>    | 2.211            | 22.590             | 2.374   | 7.286          |
| Ham                            | 24.833                | <b>19.101</b>  | 20.397          | 20.713           | 55.769             | 22.807  | 30.685         |
| HandOutlines                   | 3.400                 | <b>2.690</b>   | 2.814           | 28.759           | 353.235            | 3.422   | 7.838          |
| Haptics                        | 16.424                | 14.351         | <b>14.129</b>   | 14.320           | 172.988            | 16.464  | 39.559         |
| Herring                        | 1.212                 | <b>0.946</b>   | 1.022           | 1.349            | 71.388             | 2.097   | 1.884          |
| InlineSkate                    | 83.107                | 29.672         | <b>22.819</b>   | N/A              | N/A                | N/A     | N/A            |
| ItalyPowerDemand               | 2.442                 | <b>2.124</b>   | 2.316           | 2.372            | 5.434              | 2.355   | 2.329          |
| MedicalImages                  | 6.934                 | <b>5.809</b>   | 5.980           | 6.089            | 22.777             | 6.252   | 10.911         |
| MiddlePhalanxOutlineAgeGroup   | 0.858                 | 0.753          | 1.305           | 1.375            | 11.474             | 1.605   | <b>0.624</b>   |
| MiddlePhalanxOutlineCorrect    | 0.832                 | 0.714          | 0.985           | 1.030            | 11.643             | 1.678   | <b>0.611</b>   |
| MiddlePhalanxTW                | 0.755                 | 0.581          | 0.963           | 1.206            | 10.684             | 1.274   | <b>0.447</b>   |
| MoteStrain                     | 24.177                | 21.639         | 21.616          | <b>21.554</b>    | 32.007             | 22.437  | 26.646         |
| NonInvasiveFatalECG_Thorax1    | 6.671                 | <b>3.324</b>   | 4.738           | 5.031            | 59.162             | 6.378   | 3.568          |
| NonInvasiveFatalECG_Thorax2    | <b>2.559</b>          | 3.159          | 3.587           | 4.097            | 40339.200          | 6.494   | 2.864          |
| OSULeaf                        | 30.041                | 20.692         | 20.034          | <b>19.950</b>    | 76.057             | 23.915  | 136.512        |
| OliveOil                       | 0.657                 | 0.959          | 1.494           | 1.804            | 95.499             | 3.420   | <b>0.008</b>   |
| PhalangesOutlinesCorrect       | 1.383                 | <b>1.114</b>   | 1.405           | 1.516            | 11.070             | 1.743   | 1.210          |
| Phoneme                        | 99.205                | <b>72.412</b>  | 73.666          | 73.767           | 157.124            | 78.664  | 138.157        |
| Plane                          | 1.079                 | <b>0.849</b>   | 1.220           | 1.629            | 20.328             | 2.111   | 1.209          |
| ProximalPhalanxOutlineAgeGroup | 0.618                 | 0.511          | 0.691           | 0.878            | 10.437             | 1.177   | <b>0.322</b>   |
| ProximalPhalanxOutlineCorrect  | 0.749                 | 0.654          | 0.833           | 0.882            | 10.767             | 1.111   | <b>0.615</b>   |
| ProximalPhalanxTW              | 0.653                 | 0.536          | 0.672           | 0.778            | 10.377             | 1.133   | <b>0.462</b>   |
| RefrigerationDevices           | 159.745               | 146.601        | <b>140.634</b>  | 141.200          | $\infty$           | 148.931 | 363.732        |
| ScreenType                     | 156.442               | 123.746        | <b>121.432</b>  | 122.247          | $\infty$           | 132.748 | 334.379        |
| ShapeletSim                    | 236.039               | <b>123.605</b> | 125.657         | 126.062          | 154.480            | 130.428 | 283.458        |
| ShapesAll                      | 15.267                | 7.108          | <b>6.466</b>    | 6.818            | 58.734             | 8.236   | 67.790         |
| SmallKitchenAppliances         | 176.073               | 164.419        | <b>162.009</b>  | 162.585          | $\infty$           | 168.170 | 524.542        |
| SonyAIBORobotSurface           | 5.735                 | <b>4.916</b>   | 5.425           | 5.337            | $\infty$           | 5.813   | 5.430          |
| SonyAIBORobotSurfaceII         | 11.994                | <b>11.048</b>  | 11.278          | 11.405           | 6637415.793        | 11.481  | 13.783         |
| StarLightCurves                | 22.342                | 11.757         | 7.934           | <b>7.654</b>     | 102.255            | 11.600  | 47.353         |
| Strawberry                     | 1.392                 | <b>1.191</b>   | 1.477           | 1.627            | 28.696             | 2.347   | 1.300          |
| SwedishLeaf                    | 2.409                 | <b>1.968</b>   | 2.476           | 2.904            | 19.638             | 3.283   | 6.274          |
| Symbols                        | 0.845                 | 0.488          | <b>0.439</b>    | 0.460            | $\infty$           | 0.828   | 4.953          |
| ToeSegmentation1               | 35.904                | 27.461         | <b>26.554</b>   | 26.988           | 63.040             | 29.838  | 129.858        |
| ToeSegmentation2               | 34.177                | 24.476         | <b>23.003</b>   | 23.194           | $\infty$           | 24.944  | 170.222        |
| Trace                          | 2.686                 | 1.453          | <b>0.870</b>    | 1.031            | 43.017             | 2.233   | 26.037         |
| TwoLeadECG                     | 1.811                 | <b>1.514</b>   | 1.641           | 1.701            | 7.961              | 1.802   | 2.216          |
| Two_Patterns                   | 12.048                | 9.294          | <b>7.764</b>    | 8.143            | 22.489             | 8.937   | 60.963         |
| UWaveGestureLibraryAll         | 68.276                | 42.692         | <b>38.327</b>   | 40.320           | $\infty$           | 49.486  | 181.901        |
| Wine                           | 0.728                 | 0.500          | 0.746           | 1.147            | 32.463             | 1.812   | <b>0.094</b>   |
| WordsSynonyms                  | 9.305                 | 4.917          | <b>4.491</b>    | 4.740            | 48.605             | 7.209   | 29.713         |
| Worms                          | 100.683               | 64.029         | 61.527          | 61.296           | <b>35.906</b>      | 68.282  | 421.381        |
| WormsTwoClass                  | 110.292               | 68.932         | 66.258          | 65.964           | <b>37.047</b>      | 72.387  | 430.774        |
| synthetic_control              | 14.366                | <b>7.115</b>   | 7.506           | 7.516            | 15.931             | 8.123   | 12.187         |
| uWaveGestureLibrary_X          | 27.610                | 16.618         | 14.902          | <b>14.442</b>    | $\infty$           | 18.269  | 75.119         |
| uWaveGestureLibrary_Y          | 29.964                | 16.106         | 14.556          | <b>14.450</b>    | $\infty$           | 15.961  | 74.405         |
| uWaveGestureLibrary_Z          | 40.154                | 24.001         | <b>22.462</b>   | 22.656           | $\infty$           | 25.040  | 107.540        |
| wafer                          | 25.831                | <b>23.595</b>  | 25.828          | 25.195           | $\infty$           | 27.323  | 65.100         |
| yoga                           | 27.418                | 13.524         | <b>11.828</b>   | 12.051           | 40.171             | 15.319  | 111.236        |



H. Barycenters: DTW loss (Eq. (4) with  $\gamma = 0$ ) achieved with Euclidean init

| Dataset                        | Soft-DTW $\gamma = 1$ | $\gamma = 0.1$ | $\gamma = 0.01$ | $\gamma = 0.001$ | Subgradient method | DBA           | Euclidean mean |
|--------------------------------|-----------------------|----------------|-----------------|------------------|--------------------|---------------|----------------|
| 50words                        | 5.400                 | 2.895          | <b>2.355</b>    | 2.439            | 4.064              | 2.595         | 22.294         |
| Adiac                          | 0.124                 | 0.103          | 0.089           | <b>0.069</b>     | 0.081              | 0.071         | 0.103          |
| ArrowHead                      | 2.677                 | 1.759          | <b>1.282</b>    | 1.327            | 1.587              | 1.411         | 2.965          |
| Beef                           | 14.814                | 6.412          | <b>5.252</b>    | 5.694            | 11.112             | 5.528         | 31.486         |
| BeetleFly                      | 33.082                | 20.819         | <b>20.781</b>   | 22.127           | 25.554             | 21.960        | 191.285        |
| BirdChicken                    | 21.646                | 9.445          | <b>7.807</b>    | 8.026            | 473.653            | 8.243         | 70.614         |
| CBF                            | 22.498                | 11.844         | <b>11.433</b>   | 11.597           | 15.321             | 12.291        | 28.228         |
| Car                            | 1.556                 | 0.932          | <b>0.693</b>    | 0.901            | 1.171              | 1.079         | 2.439          |
| ChlorineConcentration          | 19.239                | 10.663         | <b>10.434</b>   | 10.468           | 11.370             | 10.638        | 13.549         |
| CinC_ECG_torso                 | 112.562               | 78.292         | 69.415          | 70.383           | 76.693             | <b>68.641</b> | 751.445        |
| Coffee                         | 1.078                 | 0.657          | 0.460           | <b>0.393</b>     | 0.435              | 0.399         | 0.571          |
| Computers                      | 172.590               | <b>138.605</b> | 144.576         | 146.409          | $\infty$           | 154.956       | 381.271        |
| Cricket_X                      | 48.334                | 35.136         | <b>33.103</b>   | 33.312           | 42.018             | 34.430        | 125.879        |
| Cricket_Y                      | 41.804                | 31.395         | <b>31.044</b>   | 31.158           | 35.957             | 31.749        | 97.393         |
| Cricket_Z                      | 46.957                | <b>33.453</b>  | 34.005          | 33.708           | 45.125             | 36.025        | 140.474        |
| DiatomSizeReduction            | 0.039                 | 0.033          | 0.028           | 0.021            | 0.024              | <b>0.019</b>  | 0.032          |
| DistalPhalanxOutlineAgeGroup   | 1.578                 | 0.988          | 0.784           | <b>0.779</b>     | 0.847              | 0.794         | 1.075          |
| DistalPhalanxOutlineCorrect    | 2.878                 | 2.002          | <b>1.751</b>    | 1.754            | 2475.922           | 1.790         | 2.780          |
| DistalPhalanxTW                | 1.377                 | 0.837          | 0.655           | <b>0.651</b>     | 0.773              | 0.667         | 0.997          |
| ECG200                         | 7.266                 | 5.608          | <b>5.395</b>    | 5.424            | 5.955              | 5.494         | 9.638          |
| ECG5000                        | 12.430                | 10.377         | <b>10.332</b>   | 10.343           | 12.340             | 10.595        | 18.886         |
| ECGFiveDays                    | 8.416                 | 7.452          | <b>7.046</b>    | 7.101            | 145.106            | 7.145         | 23.477         |
| Earthquakes                    | 172.035               | 91.568         | <b>90.684</b>   | 91.071           | $\infty$           | 92.126        | 335.240        |
| ElectricDevices                | 30.832                | <b>26.480</b>  | 27.131          | 27.076           | $\infty$           | 27.615        | 57.938         |
| FISH                           | 1.183                 | 0.806          | 0.541           | <b>0.508</b>     | 0.645              | 0.551         | 1.933          |
| FaceAll                        | 18.102                | 13.305         | 13.104          | <b>13.074</b>    | 16.491             | 13.915        | 40.404         |
| FaceFour                       | 17.070                | 13.069         | <b>12.984</b>   | 13.091           | $\infty$           | 13.568        | 28.203         |
| FacesUCR                       | 17.172                | <b>13.081</b>  | 13.293          | 13.394           | 15.780             | 13.498        | 35.942         |
| FordA                          | 53.903                | 42.199         | <b>41.835</b>   | 41.966           | 53.545             | 44.259        | 235.362        |
| FordB                          | 61.168                | 48.150         | <b>47.327</b>   | 47.743           | 60.120             | 50.121        | 246.802        |
| Gun_Point                      | 5.924                 | 2.132          | 1.695           | <b>1.666</b>     | 2.543              | 1.682         | 5.906          |
| Ham                            | 25.353                | 18.841         | 17.457          | <b>17.294</b>    | $\infty$           | 17.917        | 32.456         |
| HandOutlines                   | 2.238                 | 1.718          | 1.004           | 0.527            | $\infty$           | <b>0.515</b>  | 6.452          |
| Haptics                        | 12.554                | 8.874          | <b>7.785</b>    | 8.197            | 12.193             | 8.219         | 35.613         |
| Herring                        | 1.655                 | 1.117          | 0.809           | <b>0.760</b>     | 0.956              | 0.817         | 2.564          |
| InlineSkate                    | 100.849               | 46.460         | <b>27.248</b>   | 35.578           | N/A                | N/A           | N/A            |
| ItalyPowerDemand               | 2.597                 | 1.990          | <b>1.956</b>    | 1.985            | 2.132              | 1.997         | 2.449          |
| MedicalImages                  | 5.719                 | 4.319          | 4.145           | <b>4.070</b>     | 4.791              | 4.371         | 8.047          |
| MiddlePhalanxOutlineAgeGroup   | 0.870                 | 0.578          | 0.427           | <b>0.415</b>     | 0.464              | 0.426         | 0.552          |
| MiddlePhalanxOutlineCorrect    | 0.799                 | 0.609          | 0.460           | <b>0.443</b>     | 0.501              | 0.461         | 0.577          |
| MiddlePhalanxTW                | 0.658                 | 0.466          | 0.335           | <b>0.321</b>     | 0.358              | 0.332         | 0.434          |
| MoteStrain                     | 24.451                | <b>20.720</b>  | 20.829          | 21.057           | $\infty$           | 21.273        | 26.694         |
| NonInvasiveFatalECG_Thorax1    | 1.619                 | 1.384          | 0.907           | 0.785            | <b>0.691</b>       | 0.814         | 1.400          |
| NonInvasiveFatalECG_Thorax2    | 1.624                 | 1.370          | 0.932           | <b>0.827</b>     | 2.163              | 0.853         | 1.409          |
| OSULeaf                        | 27.428                | 18.666         | <b>18.544</b>   | 18.595           | 24.692             | 20.244        | 135.980        |
| OliveOil                       | 0.367                 | 0.074          | 0.022           | 0.013            | 0.011              | <b>0.009</b>  | 0.011          |
| PhalangesOutlinesCorrect       | 1.172                 | 0.895          | 0.699           | <b>0.695</b>     | 0.766              | 0.704         | 1.002          |
| Phoneme                        | 135.535               | <b>104.971</b> | 105.478         | 108.031          | 126.055            | 108.513       | 254.392        |
| Plane                          | 0.928                 | 0.600          | 0.404           | <b>0.399</b>     | 0.499              | 0.430         | 1.203          |
| ProximalPhalanxOutlineAgeGroup | 0.820                 | 0.502          | 0.361           | <b>0.346</b>     | 0.390              | 0.356         | 0.512          |
| ProximalPhalanxOutlineCorrect  | 0.816                 | 0.630          | 0.463           | <b>0.452</b>     | 0.517              | 0.461         | 0.669          |
| ProximalPhalanxTW              | 0.637                 | 0.431          | 0.313           | <b>0.304</b>     | 0.341              | 0.308         | 0.471          |
| RefrigerationDevices           | 154.420               | <b>133.321</b> | 135.721         | 135.300          | $\infty$           | 142.697       | 358.823        |
| ScreenType                     | 189.188               | 143.582        | 143.894         | <b>141.776</b>   | $\infty$           | 148.464       | 325.840        |
| ShapeletSim                    | 231.937               | 124.443        | <b>122.000</b>  | 122.506          | 154.089            | 127.977       | 284.079        |
| ShapesAll                      | 13.416                | 7.519          | <b>6.420</b>    | 6.509            | 7.317              | 7.478         | 80.306         |
| SmallKitchenAppliances         | 188.030               | 173.670        | 169.755         | <b>167.097</b>   | $\infty$           | 173.004       | 505.356        |
| SonyAIBORobotSurface           | 5.715                 | 4.002          | 3.870           | 3.896            | $\infty$           | <b>3.828</b>  | 5.444          |
| SonyAIBORobotSurfaceII         | 11.300                | 8.947          | <b>8.853</b>    | 8.871            | 12.651             | 8.977         | 14.225         |
| StarLightCurves                | 13.581                | 6.619          | 4.054           | <b>3.765</b>     | 7.247              | 4.517         | 30.354         |
| Strawberry                     | 2.218                 | 1.413          | 1.128           | <b>1.070</b>     | 1.374              | 1.156         | 2.128          |
| SwedishLeaf                    | 2.957                 | 2.068          | <b>2.049</b>    | 2.081            | 2.520              | 2.163         | 6.236          |
| Symbols                        | 0.762                 | 0.451          | 0.412           | <b>0.401</b>     | $\infty$           | 0.474         | 4.822          |
| ToeSegmentation1               | 35.832                | 26.067         | 26.337          | <b>25.735</b>    | 31.157             | 27.493        | 131.683        |
| ToeSegmentation2               | 34.264                | 22.238         | <b>20.800</b>   | 21.563           | $\infty$           | 23.080        | 164.101        |
| Trace                          | 1.737                 | 1.744          | 1.508           | <b>1.378</b>     | 4.170              | 1.969         | 26.814         |
| TwoLeadECG                     | 1.533                 | 1.172          | <b>1.030</b>    | 1.043            | 1.323              | 1.093         | 2.046          |
| Two_Patterns                   | 10.891                | 7.505          | <b>6.045</b>    | 6.079            | 18.987             | 6.584         | 66.027         |
| UWaveGestureLibraryAll         | 67.549                | 38.179         | <b>32.894</b>   | 33.426           | $\infty$           | 39.241        | 167.486        |
| Wine                           | 0.707                 | 0.188          | 0.127           | 0.111            | 0.114              | <b>0.110</b>  | 0.118          |
| WordsSynonyms                  | 9.804                 | 7.282          | <b>6.711</b>    | 6.785            | 8.884              | 6.868         | 39.843         |
| Worms                          | 101.850               | 61.067         | 58.725          | <b>56.793</b>    | 244.738            | 63.234        | 415.674        |
| WormsTwoClass                  | 122.901               | 68.771         | <b>64.655</b>   | 64.898           | 1297.616           | 72.011        | 395.088        |
| synthetic_control              | 18.147                | <b>9.189</b>   | 9.307           | 9.350            | 11.520             | 9.614         | 19.237         |
| uWaveGestureLibrary_X          | 34.423                | 19.787         | 18.746          | <b>17.807</b>    | $\infty$           | 24.269        | 93.839         |
| uWaveGestureLibrary_Y          | 27.744                | 14.309         | <b>13.010</b>   | 13.607           | $\infty$           | 15.283        | 51.854         |
| uWaveGestureLibrary_Z          | 21.927                | 10.081         | 8.456           | <b>8.453</b>     | $\infty$           | 11.040        | 47.947         |
| wafer                          | 32.561                | 29.197         | 28.908          | <b>28.820</b>    | $\infty$           | 33.379        | 67.413         |
| yoga                           | 23.698                | 11.632         | 9.433           | <b>9.204</b>     | 16.239             | 10.058        | 93.688         |

## I. $k$ -means clustering: DTW loss achieved (Eq. (5) with $\gamma = 0$ , log-scaled) when using random initialization

| Dataset                      | Soft-DTW $\gamma = 1$ | $\gamma = 0.1$ | $\gamma = 0.01$ | $\gamma = 0.001$ | Subgradient method | DBA           | Euclidean mean |
|------------------------------|-----------------------|----------------|-----------------|------------------|--------------------|---------------|----------------|
| 50words                      | 16.294                | 16.193         | <b>16.125</b>   | 16.135           | 16.163             | 16.156        | 16.205         |
| Adiac                        | <b>11.933</b>         | <b>11.933</b>  | <b>11.933</b>   | <b>11.933</b>    | <b>11.933</b>      | <b>11.933</b> | <b>11.933</b>  |
| ArrowHead                    | 9.020                 | 8.757          | 8.699           | <b>8.687</b>     | 8.732              | 8.692         | 8.958          |
| Beef                         | 11.215                | 11.095         | 11.069          | <b>11.061</b>    | <b>11.061</b>      | 11.117        | 11.215         |
| BeetleFly                    | 9.946                 | 9.618          | <b>9.531</b>    | 9.592            | 9.619              | 9.591         | 10.368         |
| BirdChicken                  | 9.996                 | 9.652          | <b>9.374</b>    | 9.515            | 9.870              | 9.585         | 10.335         |
| CBF                          | 10.150                | 10.065         | <b>10.005</b>   | 10.006           | 10.009             | 10.009        | 10.150         |
| Car                          | 9.392                 | 9.290          | 9.067           | <b>9.039</b>     | 9.059              | 9.046         | 9.276          |
| ChlorineConcentration        | 15.512                | 15.214         | 15.182          | <b>15.175</b>    | 15.176             | 15.176        | 15.331         |
| CinC_ECG_torso               | 13.134                | <b>12.837</b>  | 12.848          | 12.868           | 13.621             | 12.877        | 13.621         |
| Coffee                       | 7.150                 | 6.893          | 6.692           | <b>6.628</b>     | 6.693              | 6.651         | 6.825          |
| Computers                    | <b>16.420</b>         | 16.498         | 16.489          | 16.502           | 16.960             | 16.475        | 16.960         |
| Cricket_X                    | 16.922                | 16.696         | 16.629          | <b>16.628</b>    | 16.649             | 16.653        | 16.955         |
| Cricket_Y                    | 16.783                | 16.588         | 16.545          | <b>16.533</b>    | 16.570             | 16.570        | 16.803         |
| Cricket_Z                    | 16.874                | 16.669         | 16.597          | <b>16.593</b>    | 16.620             | 16.620        | 16.981         |
| DiatomSizeReduction          | 5.959                 | 5.907          | 5.889           | <b>5.739</b>     | 5.798              | 5.758         | 5.932          |
| DistalPhalanxOutlineAgeGroup | 11.193                | 11.220         | 11.202          | 11.198           | 11.194             | 11.196        | <b>11.158</b>  |
| DistalPhalanxOutlineCorrect  | 12.467                | 12.373         | <b>12.340</b>   | 12.342           | 12.494             | 12.350        | 12.483         |
| DistalPhalanxTW              | 11.244                | 11.260         | 11.263          | 11.251           | 11.264             | 11.261        | <b>11.222</b>  |
| ECG200                       | 11.395                | 11.317         | 11.323          | <b>11.274</b>    | 11.300             | 11.289        | 11.501         |
| ECG5000                      | 16.169                | <b>16.084</b>  | 16.142          | 16.136           | 16.137             | 16.136        | 16.211         |
| ECGFiveDays                  | 8.734                 | 8.579          | 8.522           | <b>8.513</b>     | 8.713              | 8.533         | 8.818          |
| Earthquakes                  | 14.757                | 14.727         | <b>14.726</b>   | 14.728           | 14.757             | <b>14.726</b> | 14.757         |
| ElectricDevices              | 22.404                | 22.428         | 22.401          | 22.398           | 22.630             | 22.399        | <b>22.332</b>  |
| FISH                         | 10.841                | 10.740         | 10.594          | <b>10.514</b>    | 10.560             | 10.566        | 10.841         |
| FaceAll                      | 16.272                | 16.187         | 16.185          | 16.183           | 16.197             | <b>16.182</b> | 16.291         |
| FaceFour                     | 10.422                | 10.318         | <b>10.302</b>   | 10.316           | 10.575             | 10.321        | 10.533         |
| FacesUCR                     | 14.479                | 14.432         | 14.426          | <b>14.423</b>    | 14.430             | 14.429        | 14.431         |
| FordA                        | 18.604                | 18.390         | 18.388          | 18.387           | 18.977             | <b>18.385</b> | 18.977         |
| FordB                        | 17.620                | 17.429         | 17.425          | 17.426           | 17.466             | <b>17.416</b> | 17.998         |
| Gun_Point                    | 10.242                | 10.019         | 9.843           | 9.743            | 9.883              | <b>9.738</b>  | 10.130         |
| Ham                          | 12.772                | 12.545         | 12.488          | <b>12.473</b>    | 13.240             | 12.506        | 12.957         |
| MedicalImages                | 15.081                | 14.982         | 14.985          | <b>14.979</b>    | 14.986             | 14.986        | 15.032         |
| MiddlePhalanxOutlineAgeGroup | 9.909                 | 9.919          | 9.856           | <b>9.818</b>     | 9.824              | 9.822         | 9.856          |
| MiddlePhalanxOutlineCorrect  | 11.121                | 11.088         | 10.984          | 10.951           | 10.962             | 10.961        | <b>10.923</b>  |
| MiddlePhalanxTW              | <b>10.514</b>         | <b>10.514</b>  | <b>10.514</b>   | <b>10.514</b>    | <b>10.514</b>      | <b>10.514</b> | <b>10.514</b>  |
| MoteStrain                   | 9.560                 | 9.484          | 9.460           | 9.451            | <b>9.201</b>       | 9.470         | 9.557          |
| NonInvasiveFatalECG_ThoraxI  | <b>17.728</b>         | N/A            | N/A             | N/A              | N/A                | N/A           | N/A            |
| ProximalPhalanxTW            | 11.055                | 10.993         | 10.978          | <b>10.958</b>    | 10.968             | 10.965        | 10.968         |
| RefrigerationDevices         | 17.391                | 17.351         | <b>17.311</b>   | 17.322           | 17.758             | 17.324        | 17.758         |
| ScreenType                   | 17.467                | 17.388         | 17.306          | 17.297           | 18.126             | <b>17.289</b> | 17.838         |
| ShapeletSim                  | 11.176                | <b>10.896</b>  | 10.905          | 10.906           | 10.916             | 10.915        | 11.176         |
| ShapesAll                    | 17.539                | 17.405         | <b>17.331</b>   | 17.333           | 17.605             | 17.357        | 17.509         |
| SmallKitchenAppliances       | 17.551                | 17.611         | <b>17.537</b>   | 17.606           | 18.007             | 17.561        | 18.007         |
| SonyAIBORobotSurface         | 8.181                 | 7.959          | <b>7.934</b>    | 7.943            | 8.247              | 7.958         | 8.084          |
| SonyAIBORobotSurfaceII       | 9.349                 | <b>9.265</b>   | 9.267           | 9.267            | 9.325              | 9.277         | 9.338          |
| StarLightCurves              | 19.435                | 19.110         | <b>19.012</b>   | N/A              | N/A                | N/A           | N/A            |
| Trace                        | 14.570                | 14.570         | 14.556          | <b>14.550</b>    | 14.555             | 14.556        | 14.553         |
| TwoLeadECG                   | 6.939                 | 6.939          | 6.892           | 6.879            | 6.936              | 6.892         | <b>6.743</b>   |
| Two_Patterns                 | 17.416                | 17.379         | 17.317          | 17.325           | 17.524             | <b>17.307</b> | 17.524         |
| UWaveGestureLibraryAll       | 18.911                | 18.641         | <b>18.514</b>   | 18.531           | 19.282             | 18.537        | 19.244         |
| Wine                         | 7.527                 | 7.297          | 6.482           | 6.358            | 6.390              | 6.353         | <b>6.223</b>   |
| WordsSynonyms                | 15.209                | 15.093         | <b>15.024</b>   | 15.025           | 15.053             | 15.036        | 15.159         |
| Worms                        | 14.184                | 14.051         | <b>13.889</b>   | 13.896           | 14.943             | 13.968        | 14.648         |
| WormsTwoClass                | 13.727                | 13.471         | <b>13.429</b>   | 13.462           | 14.944             | 13.494        | 14.944         |
| synthetic_control            | 15.338                | 15.303         | 15.292          | 15.291           | 15.303             | 15.295        | <b>15.278</b>  |
| uWaveGestureLibrary_X        | 18.789                | <b>18.568</b>  | N/A             | N/A              | N/A                | N/A           | N/A            |

## J. $k$ -means clustering: DTW loss achieved (Eq. (5) with $\gamma = 0$ , log-scaled) when using Euclidean mean initialization

| Dataset                      | Soft-DTW $\gamma = 1$ | $\gamma = 0.1$ | $\gamma = 0.01$ | $\gamma = 0.001$ | Subgradient method | DBA           | Euclidean mean |
|------------------------------|-----------------------|----------------|-----------------|------------------|--------------------|---------------|----------------|
| 50words                      | 16.233                | 16.145         | 16.046          | <b>16.035</b>    | 16.045             | 16.233        | 16.233         |
| Adiac                        | 12.311                | 12.311         | 12.264          | 12.241           | 12.234             | <b>12.233</b> | 12.311         |
| ArrowHead                    | 9.014                 | 8.963          | 8.766           | <b>8.746</b>     | 8.851              | 8.809         | 9.014          |
| Beef                         | 11.225                | 11.110         | 11.088          | 11.079           | 11.077             | <b>11.070</b> | 11.300         |
| BeetleFly                    | 9.895                 | 9.290          | 9.268           | <b>9.240</b>     | 9.512              | 10.926        | 10.926         |
| BirdChicken                  | 10.032                | 9.542          | 9.352           | <b>9.338</b>     | 9.422              | 9.414         | 10.335         |
| CBF                          | 10.246                | 9.995          | 9.910           | <b>9.908</b>     | 9.933              | 9.921         | 10.246         |
| Car                          | 9.276                 | 9.229          | 8.989           | <b>8.910</b>     | 8.936              | 8.935         | 9.276          |
| ChlorineConcentration        | 15.331                | 15.291         | 15.254          | <b>15.252</b>    | 15.270             | <b>15.252</b> | 15.331         |
| CinC_ECG_torso               | 13.197                | 12.803         | 12.752          | <b>12.728</b>    | 13.723             | 13.723        | 13.723         |
| Coffee                       | 6.825                 | 6.825          | 6.668           | 6.599            | 6.605              | <b>6.591</b>  | 6.825          |
| Computers                    | 16.417                | 16.346         | 16.301          | <b>16.289</b>    | 17.167             | 16.342        | 17.167         |
| Cricket_X                    | 16.895                | 16.719         | 16.622          | 16.623           | 16.612             | <b>16.600</b> | 16.987         |
| Cricket_Y                    | 16.770                | 16.651         | 16.546          | <b>16.514</b>    | 16.515             | 16.527        | 16.861         |
| Cricket_Z                    | 16.924                | 16.748         | 16.670          | <b>16.633</b>    | 16.653             | 16.653        | 17.028         |
| DiatomSizeReduction          | 5.963                 | 5.963          | 5.963           | <b>5.884</b>     | 5.897              | 5.896         | 5.963          |
| DistalPhalanxOutlineAgeGroup | <b>11.164</b>         | <b>11.164</b>  | <b>11.164</b>   | <b>11.164</b>    | <b>11.164</b>      | <b>11.164</b> | <b>11.164</b>  |
| DistalPhalanxOutlineCorrect  | 12.544                | 12.533         | 12.494          | 12.475           | <b>12.240</b>      | 12.479        | 12.577         |
| DistalPhalanxTW              | <b>11.242</b>         | 11.259         | 11.256          | 11.243           | 11.251             | 11.245        | 11.259         |
| ECG200                       | 11.462                | 11.291         | 11.239          | <b>11.222</b>    | 11.231             | 11.234        | 11.503         |
| ECG5000                      | 16.253                | 16.180         | 16.171          | 16.183           | <b>16.170</b>      | 16.172        | 16.262         |
| ECGFiveDays                  | 8.738                 | 8.614          | <b>8.543</b>    | 8.549            | 8.709              | 8.559         | 8.818          |
| Earthquakes                  | 15.113                | 14.625         | 14.601          | 14.599           | 15.952             | <b>14.597</b> | 15.952         |
| ElectricDevices              | 22.295                | 22.325         | 22.291          | 22.290           | 22.379             | <b>22.283</b> | 22.379         |
| FISH                         | 10.904                | 10.843         | 10.589          | 10.543           | <b>10.527</b>      | 10.555        | 10.904         |
| FaceAll                      | 16.278                | 16.162         | 16.145          | 16.145           | 16.152             | <b>16.140</b> | 16.347         |
| FaceFour                     | 10.376                | 10.273         | 10.239          | <b>10.226</b>    | 10.566             | 10.241        | 10.566         |
| FacesUCR                     | 14.472                | 14.434         | 14.406          | 14.407           | <b>14.391</b>      | 14.481        | 14.481         |
| FordA                        | 18.581                | <b>18.354</b>  | <b>18.354</b>   | 18.360           | 20.038             | 20.038        | 20.038         |
| FordB                        | 17.649                | 17.443         | 17.429          | 17.436           | 17.466             | <b>17.427</b> | 19.143         |
| Gun_Point                    | 10.334                | 10.027         | 9.806           | <b>9.751</b>     | 9.902              | 9.833         | 10.334         |
| Ham                          | 12.805                | 12.603         | 12.559          | <b>12.558</b>    | 12.974             | 12.561        | 12.974         |
| HandOutlines                 | <b>13.712</b>         | N/A            | N/A             | N/A              | N/A                | N/A           | N/A            |
| MedicalImages                | 15.082                | 14.963         | <b>14.940</b>   | 14.942           | 14.950             | 14.941        | 15.091         |
| MiddlePhalanxOutlineAgeGroup | 9.856                 | 9.856          | 9.855           | <b>9.821</b>     | 9.823              | <b>9.821</b>  | 9.856          |
| MiddlePhalanxOutlineCorrect  | 10.962                | 10.962         | 10.962          | 10.959           | <b>10.950</b>      | <b>10.950</b> | 10.962         |
| MiddlePhalanxTW              | <b>10.558</b>         | 10.587         | 10.587          | 10.569           | 10.572             | 10.570        | 10.587         |
| MoteStrain                   | 9.551                 | 9.454          | <b>9.413</b>    | 9.451            | 9.557              | 9.446         | 9.557          |
| NonInvasiveFatalECG_ThoraxI  | <b>17.765</b>         | N/A            | N/A             | N/A              | N/A                | N/A           | N/A            |
| ProximalPhalanxTW            | 10.978                | <b>10.973</b>  | 10.978          | 10.978           | 10.978             | 10.978        | 10.978         |
| RefrigerationDevices         | 17.260                | 17.202         | 17.093          | <b>17.073</b>    | 18.140             | 17.095        | 18.140         |
| ScreenType                   | 17.430                | 17.359         | 17.294          | <b>17.292</b>    | 17.838             | 17.323        | 17.838         |
| ShapeletSim                  | 11.497                | 10.864         | <b>10.845</b>   | 10.853           | 10.865             | 11.608        | 11.608         |
| ShapesAll                    | 17.560                | 17.431         | 17.335          | <b>17.328</b>    | 17.560             | 17.560        | 17.560         |
| SmallKitchenAppliances       | 17.310                | <b>17.273</b>  | 17.357          | 17.357           | 18.206             | 18.206        | 18.206         |
| SonyAIBORobotSurface         | 8.084                 | 7.980          | <b>7.941</b>    | 7.947            | 8.084              | 7.948         | 8.084          |
| SonyAIBORobotSurfaceII       | 9.338                 | 9.207          | 9.196           | <b>9.195</b>     | 9.338              | <b>9.195</b>  | 9.338          |
| StarLightCurves              | 19.457                | 19.178         | <b>19.083</b>   | N/A              | N/A                | N/A           | N/A            |
| Trace                        | 14.553                | 14.553         | 14.553          | <b>14.549</b>    | 14.553             | 14.553        | 14.553         |
| TwoLeadECG                   | 6.743                 | 6.705          | 6.623           | <b>6.606</b>     | 6.666              | 6.633         | 6.743          |
| Two_Patterns                 | <b>17.084</b>         | 17.363         | 17.242          | 17.255           | 17.518             | 17.316        | 17.942         |
| UWaveGestureLibraryAll       | 18.820                | 18.613         | 18.539          | <b>18.488</b>    | 19.259             | 18.508        | 19.259         |
| Wine                         | 6.223                 | 6.223          | 6.223           | 6.223            | 6.223              | <b>6.205</b>  | 6.223          |
| WordsSynonyms                | 15.184                | 15.036         | <b>14.947</b>   | 14.951           | 14.965             | 14.959        | 15.196         |
| Worms                        | 14.043                | 13.860         | 13.791          | 13.777           | 14.696             | <b>13.772</b> | 14.696         |
| WormsTwoClass                | 13.699                | 13.440         | <b>13.322</b>   | 13.337           | 15.076             | 13.390        | 15.076         |
| synthetic_control            | 15.472                | 15.367         | 15.337          | 15.338           | <b>15.330</b>      | 15.336        | 15.472         |
| uWaveGestureLibrary_X        | 18.844                | <b>18.562</b>  | N/A             | N/A              | N/A                | N/A           | N/A            |

## K. Time-series prediction: DTW loss achieved when using random init

| Dataset                        | Soft-DTW loss $\gamma = 1$ | $\gamma = 0.1$ | $\gamma = 0.01$ | $\gamma = 0.001$ | Euclidean loss |
|--------------------------------|----------------------------|----------------|-----------------|------------------|----------------|
| 50words                        | 6.473                      | <b>4.921</b>   | 4.999           | 6.489            | 18.734         |
| Adiac                          | 0.094                      | <b>0.074</b>   | 0.078           | 0.109            | 0.103          |
| ArrowHead                      | 1.851                      | <b>1.708</b>   | 1.933           | 1.909            | 2.073          |
| Beef                           | 12.229                     | <b>8.688</b>   | 10.244          | 9.126            | 22.228         |
| BeetleFly                      | 35.037                     | 25.439         | 27.588          | <b>23.494</b>    | 50.610         |
| BirdChicken                    | 31.878                     | 19.914         | 25.100          | <b>14.981</b>    | 30.693         |
| CBF                            | 10.802                     | <b>9.263</b>   | 9.595           | 10.151           | 12.868         |
| Car                            | 1.724                      | 2.307          | 2.202           | <b>1.318</b>     | 1.588          |
| ChlorineConcentration          | 7.876                      | 2.108          | 2.331           | 1.735            | <b>0.769</b>   |
| CinC_ECG_torso                 | 45.675                     | 26.337         | <b>23.567</b>   | 24.550           | 48.171         |
| Coffee                         | 0.914                      | 0.727          | 1.662           | 1.883            | <b>0.660</b>   |
| Computers                      | 92.584                     | 84.723         | 78.953          | <b>75.435</b>    | 235.208        |
| Cricket_X                      | 9.394                      | 8.042          | <b>7.123</b>    | 7.226            | 12.080         |
| Cricket_Y                      | 11.989                     | 9.643          | <b>9.534</b>    | 9.545            | 15.002         |
| Cricket_Z                      | 9.161                      | 6.889          | <b>6.585</b>    | 7.200            | 11.003         |
| DiatomSizeReduction            | 1.182                      | 0.922          | <b>0.820</b>    | 0.897            | 1.203          |
| DistalPhalanxOutlineAgeGroup   | 0.426                      | 0.291          | 0.541           | 0.496            | <b>0.231</b>   |
| DistalPhalanxOutlineCorrect    | 0.494                      | 0.476          | 0.564           | 0.591            | <b>0.351</b>   |
| DistalPhalanxTW                | 0.441                      | 0.330          | 0.305           | 1.214            | <b>0.231</b>   |
| ECG200                         | 1.874                      | <b>1.716</b>   | 1.884           | 1.734            | 1.905          |
| ECG5000                        | 4.895                      | 4.705          | 4.543           | <b>4.441</b>     | 5.463          |
| ECGFiveDays                    | 1.834                      | 1.944          | 1.699           | <b>1.642</b>     | 2.220          |
| Earthquakes                    | 74.738                     | 59.973         | 60.877          | <b>57.827</b>    | 147.980        |
| ElectricDevices                | 20.186                     | <b>15.125</b>  | 15.218          | 15.287           | 37.121         |
| FISH                           | 0.464                      | 0.429          | <b>0.354</b>    | 0.459            | 0.462          |
| FaceAll                        | 9.317                      | 7.451          | 7.902           | <b>7.276</b>     | 10.716         |
| FaceFour                       | <b>19.564</b>              | 20.881         | 28.150          | 28.839           | 46.841         |
| FacesUCR                       | 15.359                     | <b>14.643</b>  | 16.143          | 17.428           | 28.576         |
| Gun_Point                      | 0.896                      | <b>0.805</b>   | 0.923           | 0.834            | 0.858          |
| Ham                            | 20.154                     | 17.931         | 17.786          | <b>17.413</b>    | 24.340         |
| Haptics                        | <b>16.174</b>              | 17.775         | 17.142          | 17.423           | 23.130         |
| Herring                        | 1.000                      | 0.712          | <b>0.666</b>    | 0.762            | 0.865          |
| InsectWingbeatSound            | 3.460                      | 2.823          | 2.458           | <b>2.220</b>     | 5.437          |
| ItalyPowerDemand               | 0.911                      | 0.893          | <b>0.711</b>    | 0.798            | 0.881          |
| LargeKitchenAppliances         | 63.153                     | 60.739         | <b>60.157</b>   | 61.841           | 266.853        |
| Lighting2                      | 73.293                     | 66.341         | <b>65.335</b>   | 66.881           | 147.668        |
| Lighting7                      | 44.446                     | 42.699         | <b>40.608</b>   | 41.502           | 68.902         |
| Meat                           | 0.162                      | 0.242          | 0.246           | 0.650            | <b>0.099</b>   |
| MedicalImages                  | 1.023                      | 0.853          | <b>0.708</b>    | 0.778            | 1.211          |
| MiddlePhalanxOutlineAgeGroup   | 0.343                      | 0.347          | 0.570           | 0.400            | <b>0.312</b>   |
| MiddlePhalanxOutlineCorrect    | 0.278                      | 0.204          | 0.227           | 0.202            | <b>0.182</b>   |
| MiddlePhalanxTW                | 0.251                      | 0.153          | 0.445           | 0.314            | <b>0.132</b>   |
| MoteStrain                     | 10.188                     | <b>9.986</b>   | 11.119          | 10.250           | 11.183         |
| NonInvasiveFatalECG_Thorax1    | 1.002                      | 0.920          | 0.675           | <b>0.634</b>     | 1.219          |
| OSULeaf                        | 15.125                     | 11.722         | 11.086          | <b>10.775</b>    | 30.739         |
| OliveOil                       | 0.476                      | 0.683          | 2.082           | 2.076            | <b>0.020</b>   |
| PhalangesOutlinesCorrect       | 0.352                      | 0.216          | 0.352           | 0.338            | <b>0.170</b>   |
| Phoneme                        | 160.536                    | 150.017        | 148.175         | <b>145.093</b>   | 219.704        |
| Plane                          | 0.619                      | <b>0.564</b>   | 0.834           | 0.788            | 0.630          |
| ProximalPhalanxOutlineAgeGroup | 0.134                      | 0.062          | 0.105           | 0.118            | <b>0.046</b>   |
| ProximalPhalanxOutlineCorrect  | 0.129                      | 0.047          | 0.089           | 0.128            | <b>0.044</b>   |
| ProximalPhalanxTW              | 0.154                      | 0.077          | 0.102           | 0.150            | <b>0.055</b>   |
| RefrigerationDevices           | 108.421                    | 93.519         | <b>89.370</b>   | 89.873           | 160.361        |
| ShapeletSim                    | 102.413                    | <b>70.455</b>  | 71.156          | 72.094           | 108.936        |
| ShapesAll                      | 10.391                     | 9.027          | 7.850           | <b>7.207</b>     | 18.348         |
| SonyAIBORobotSurface           | 4.453                      | 4.494          | <b>4.318</b>    | 4.910            | 4.388          |
| SonyAIBORobotSurfaceII         | 8.072                      | 8.302          | <b>7.758</b>    | 8.669            | 8.628          |
| Strawberry                     | 0.123                      | 0.088          | 0.137           | 0.100            | <b>0.081</b>   |
| SwedishLeaf                    | 1.486                      | 1.277          | 1.316           | <b>1.169</b>     | 1.633          |
| Symbols                        | 17.963                     | 14.039         | 15.172          | <b>13.192</b>    | 38.268         |
| ToeSegmentation1               | 23.866                     | 22.987         | 26.056          | <b>22.401</b>    | 35.806         |
| ToeSegmentation2               | 41.450                     | 33.100         | <b>30.931</b>   | 31.106           | 61.899         |
| Trace                          | 0.563                      | 0.379          | 0.352           | <b>0.279</b>     | 0.582          |
| TwoLeadECG                     | 0.441                      | 0.394          | <b>0.318</b>    | 0.320            | 0.336          |
| Two_Patterns                   | 15.035                     | 10.100         | 10.588          | <b>8.584</b>     | 35.923         |
| UWaveGestureLibraryAll         | 40.324                     | 28.975         | 26.193          | <b>25.897</b>    | 93.019         |
| Wine                           | 0.164                      | 0.203          | 1.417           | 0.958            | <b>0.028</b>   |
| WordsSynonyms                  | 12.466                     | 10.437         | <b>9.165</b>    | 9.219            | 32.003         |
| Worms                          | 81.236                     | 63.938         | 60.950          | <b>59.995</b>    | 114.528        |
| WormsTwoClass                  | 78.455                     | 66.609         | <b>60.207</b>   | 61.685           | 122.619        |
| synthetic_control              | 7.709                      | <b>5.315</b>   | 5.390           | 5.506            | 7.690          |
| uWaveGestureLibrary_X          | 13.096                     | 9.995          | 10.143          | <b>9.433</b>     | 19.995         |
| uWaveGestureLibrary_Y          | 9.793                      | 7.272          | 7.327           | <b>7.225</b>     | 17.706         |
| uWaveGestureLibrary_Z          | 11.883                     | 8.909          | 8.494           | <b>8.416</b>     | 20.092         |
| wafer                          | 1.049                      | 0.473          | <b>0.386</b>    | 0.496            | 2.636          |
| yoga                           | 2.932                      | 2.431          | <b>1.995</b>    | 3.309            | 4.305          |

## L. Time-series prediction: DTW loss achieved when using Euclidean init

| Dataset                        | Soft-DTW loss $\gamma = 1$ | $\gamma = 0.1$ | $\gamma = 0.01$ | $\gamma = 0.001$ | Euclidean loss |
|--------------------------------|----------------------------|----------------|-----------------|------------------|----------------|
| 50words                        | 6.330                      | 5.628          | 4.885           | <b>4.553</b>     | 18.734         |
| Adiac                          | 0.082                      | 0.076          | <b>0.064</b>    | 0.079            | 0.103          |
| ArrowHead                      | 1.823                      | 2.016          | <b>1.762</b>    | 2.106            | 2.073          |
| Beef                           | 7.250                      | 6.940          | 7.146           | <b>3.757</b>     | 22.228         |
| BeetleFly                      | 32.430                     | <b>26.600</b>  | 27.199          | 29.003           | 50.610         |
| BirdChicken                    | 24.952                     | 22.600         | <b>19.914</b>   | 20.540           | 30.693         |
| CBF                            | 10.744                     | 8.978          | 9.215           | <b>8.398</b>     | 12.868         |
| Car                            | 0.906                      | 0.812          | <b>0.709</b>    | 0.740            | 1.588          |
| ChlorineConcentration          | 6.018                      | 0.979          | <b>0.695</b>    | 0.698            | 0.769          |
| CinC_ECG_torso                 | 29.892                     | <b>18.638</b>  | 19.635          | 19.191           | 48.171         |
| Coffee                         | 0.870                      | 0.582          | 0.511           | <b>0.496</b>     | 0.660          |
| Computers                      | 86.619                     | <b>79.250</b>  | 82.215          | 81.417           | 235.208        |
| Cricket_X                      | 10.954                     | 8.200          | <b>7.932</b>    | 8.296            | 12.080         |
| Cricket_Y                      | 11.901                     | 10.150         | 10.265          | <b>9.574</b>     | 15.002         |
| Cricket_Z                      | 9.714                      | 7.760          | <b>7.544</b>    | 8.041            | 11.003         |
| DiatomSizeReduction            | 0.964                      | <b>0.852</b>   | 0.874           | 0.869            | 1.203          |
| DistalPhalanxOutlineAgeGroup   | 0.403                      | 0.206          | <b>0.175</b>    | 0.177            | 0.231          |
| DistalPhalanxOutlineCorrect    | 0.515                      | 0.310          | 0.300           | <b>0.262</b>     | 0.351          |
| DistalPhalanxTW                | 0.468                      | 0.228          | 0.186           | <b>0.178</b>     | 0.231          |
| ECG200                         | 1.907                      | 1.541          | 1.565           | <b>1.536</b>     | 1.905          |
| ECG5000                        | 4.737                      | 4.190          | 4.398           | <b>4.148</b>     | 5.463          |
| ECGFiveDays                    | 1.584                      | 1.396          | <b>1.322</b>    | 1.335            | 2.220          |
| Earthquakes                    | 71.461                     | <b>55.819</b>  | 56.504          | 57.153           | 147.980        |
| ElectricDevices                | 19.499                     | 15.045         | <b>14.999</b>   | 15.228           | 37.121         |
| FISH                           | 0.439                      | 0.353          | 0.319           | <b>0.318</b>     | 0.462          |
| FaceAll                        | 9.309                      | 8.687          | <b>7.803</b>    | 7.853            | 10.716         |
| FaceFour                       | 20.483                     | <b>20.411</b>  | 21.259          | 21.444           | 46.841         |
| FacesUCR                       | 14.984                     | 14.530         | <b>14.403</b>   | 14.729           | 28.576         |
| Gun_Point                      | 0.447                      | 0.368          | 0.300           | <b>0.297</b>     | 0.858          |
| Ham                            | 16.152                     | 14.717         | <b>12.252</b>   | 13.424           | 24.340         |
| Haptics                        | 15.177                     | 14.275         | 12.394          | <b>11.931</b>    | 23.130         |
| Herring                        | 0.310                      | 0.305          | 0.292           | <b>0.249</b>     | 0.865          |
| InsectWingbeatSound            | 3.104                      | 2.346          | 2.186           | <b>2.036</b>     | 5.437          |
| ItalyPowerDemand               | 0.802                      | <b>0.595</b>   | 0.623           | 0.654            | 0.881          |
| LargeKitchenAppliances         | 61.531                     | 63.834         | 59.116          | <b>57.219</b>    | 266.853        |
| Lighting2                      | 65.602                     | 62.240         | 61.561          | <b>60.826</b>    | 147.668        |
| Lighting7                      | 43.930                     | 41.668         | 40.535          | <b>39.422</b>    | 68.902         |
| Meat                           | 0.173                      | 0.140          | 0.103           | <b>0.077</b>     | 0.099          |
| MedicalImages                  | 0.932                      | 0.671          | <b>0.615</b>    | 0.651            | 1.211          |
| MiddlePhalanxOutlineAgeGroup   | 0.283                      | 0.200          | <b>0.134</b>    | 0.154            | 0.312          |
| MiddlePhalanxOutlineCorrect    | 0.269                      | 0.169          | <b>0.133</b>    | 0.148            | 0.182          |
| MiddlePhalanxTW                | 0.225                      | 0.126          | 0.111           | <b>0.094</b>     | 0.132          |
| MoteStrain                     | 9.704                      | <b>9.321</b>   | 9.385           | 10.156           | 11.183         |
| NonInvasiveFatalECG_Thorax1    | 0.921                      | 0.736          | 0.540           | <b>0.536</b>     | 1.219          |
| OSULeaf                        | 16.168                     | 14.372         | 13.354          | <b>12.350</b>    | 30.739         |
| OliveOil                       | 0.179                      | 0.298          | 0.034           | 0.026            | <b>0.020</b>   |
| PhalangesOutlinesCorrect       | 0.328                      | 0.231          | 0.161           | <b>0.153</b>     | 0.170          |
| Phoneme                        | 173.501                    | <b>158.036</b> | 159.293         | 158.776          | 219.704        |
| Plane                          | 0.454                      | 0.343          | <b>0.311</b>    | 0.370            | 0.630          |
| ProximalPhalanxOutlineAgeGroup | 0.137                      | 0.056          | 0.039           | <b>0.036</b>     | 0.046          |
| ProximalPhalanxOutlineCorrect  | 0.118                      | 0.046          | 0.033           | <b>0.030</b>     | 0.044          |
| ProximalPhalanxTW              | 0.164                      | 0.067          | 0.054           | <b>0.045</b>     | 0.055          |
| RefrigerationDevices           | 107.693                    | 95.458         | <b>90.328</b>   | 91.687           | 160.361        |
| ShapeletSim                    | 106.805                    | 73.626         | <b>72.985</b>   | 73.987           | 108.936        |
| ShapesAll                      | 11.946                     | 7.724          | <b>7.127</b>    | 7.522            | 18.348         |
| SonyAIBORobotSurface           | 4.068                      | 3.619          | <b>3.400</b>    | 3.737            | 4.388          |
| SonyAIBORobotSurfaceII         | 6.954                      | 6.585          | <b>6.410</b>    | 6.593            | 8.628          |
| Strawberry                     | 0.110                      | 0.082          | 0.071           | <b>0.069</b>     | 0.081          |
| SwedishLeaf                    | 1.438                      | 1.151          | <b>1.095</b>    | 1.108            | 1.633          |
| Symbols                        | 14.717                     | <b>12.040</b>  | 15.229          | 16.199           | 38.268         |
| ToeSegmentation1               | 24.293                     | <b>20.905</b>  | 22.914          | 22.566           | 35.806         |
| ToeSegmentation2               | 44.439                     | 36.333         | <b>35.804</b>   | 41.121           | 61.899         |
| Trace                          | 0.578                      | 0.331          | 0.272           | <b>0.250</b>     | 0.582          |
| TwoLeadECG                     | 0.157                      | 0.131          | <b>0.129</b>    | 0.149            | 0.336          |
| Two_Patterns                   | 14.843                     | 11.616         | 11.622          | <b>11.059</b>    | 35.923         |
| UWaveGestureLibraryAll         | 42.336                     | 30.864         | 27.572          | <b>26.573</b>    | 93.019         |
| Wine                           | 0.069                      | 0.263          | 0.045           | 0.029            | <b>0.028</b>   |
| WordsSynonyms                  | 12.654                     | 10.089         | 9.887           | <b>8.946</b>     | 32.003         |
| Worms                          | 74.589                     | 71.946         | 70.245          | <b>67.669</b>    | 114.528        |
| WormsTwoClass                  | 81.311                     | <b>61.360</b>  | 62.281          | 74.672           | 122.619        |
| synthetic_control              | 7.455                      | 5.509          | 5.374           | <b>5.369</b>     | 7.690          |
| uWaveGestureLibrary_X          | 14.151                     | 10.065         | 9.231           | <b>9.197</b>     | 19.995         |
| uWaveGestureLibrary_Y          | 9.852                      | 7.285          | 7.066           | <b>7.036</b>     | 17.706         |
| uWaveGestureLibrary_Z          | 12.019                     | 8.893          | <b>8.453</b>    | 8.513            | 20.092         |
| wafer                          | 1.125                      | 0.838          | <b>0.765</b>    | 0.818            | 2.636          |
| yoga                           | 2.510                      | 2.209          | <b>1.807</b>    | 1.851            | 4.305          |
